# Supplementary material for: Childhood body size and pubertal timing in relation to adult mammographic density phenotype
Source: Springer Nature journal article supplement (doi:10.1186/s13058-017-0804-y), 2017-02-07
Supplement: MOESM1 [file 12053014]

## Childhood body size and pubertal timing in relation to adult mammographic density phenotype

### Supplementary tables

Table S1: Number of subjects included in analyses of categories of body size and pubertal factors.

| Factor                      | Categories, numbers (%) |                       |                  |                 | Missing or not applicable |
|-----------------------------|-------------------------|-----------------------|------------------|-----------------|---------------------------|
|                             | <i>Thinner</i>          | <i>About the same</i> | <i>Heavier</i>   |                 |                           |
| Weight at age 7 years       | 311 (28.8)              | 633 (58.7)            | 135 (12.5)       |                 | 26                        |
| Weight at age 11 years      | 299 (27.4)              | 589 (53.9)            | 204 (18.7)       |                 | 13                        |
|                             | <i>Shorter</i>          | <i>About the same</i> | <i>Taller</i>    |                 |                           |
| Height at age 7 years       | 245 (23.0)              | 542 (50.8)            | 280 (26.2)       |                 | 38                        |
| Height at age 11 years      | 281 (26.0)              | 458 (42.3)            | 343 (31.7)       |                 | 23                        |
|                             | <i>≤10 years</i>        | <i>11-12 years</i>    | <i>≥13 years</i> |                 |                           |
| Age at thelarche            | 111 (12.6)              | 415 (47.0)            | 357 (40.4)       |                 | 222                       |
|                             | <i>≤12 years</i>        | <i>13-14 years</i>    | <i>≥15 years</i> |                 |                           |
| Age at menarche             | 454 (45.6)              | 435 (43.7)            | 107 (10.7)       |                 | 109                       |
| Age at regular cycles       | 243 (36.3)              | 265 (40.0)            | 162 (24.2)       |                 | 435                       |
|                             | <i>≤14 years</i>        | <i>15-16 years</i>    | <i>≥17 years</i> |                 |                           |
| Age reached adult height    | 192 (32.1)              | 255 (42.6)            | 152 (25.4)       |                 | 506                       |
|                             | <i>&lt;0 years</i>      | <i>0 years</i>        | <i>1 years</i>   | <i>≥2 years</i> |                           |
| Thelarche to menarche       | 73 (9.0)                | 315 (38.7)            | 310 (38.1)       | 116 (14.3)      | 291                       |
| Thelarche to regular cycles | 31 (5.3)                | 141 (24.1)            | 223 (38.1)       | 190 (32.5)      | 520                       |
| Menarche to regular cycles  |                         | 395 (59.0)            | 196 (29.3)       | 79 (11.8)       | 435                       |
|                             | <i>&lt;2 years</i>      | <i>2-3 years</i>      | <i>≥4 years</i>  |                 |                           |
| Thelarche to adult height   | 96 (17.6)               | 209 (38.4)            | 239 (43.9)       |                 | 561                       |
| Menarche to adult height    | 169 (30.9)              | 195 (35.6)            | 184 (33.6)       |                 | 557                       |

Table S2: Adjusted means of pubertal variables, anthropometric and mammographic density characteristics by weight compared with peers at age 11 years

|                                                 | Weight at age 11 years relative to peers |                |         | P trend (c) |
|-------------------------------------------------|------------------------------------------|----------------|---------|-------------|
|                                                 | Thinner                                  | About the same | Heavier |             |
|                                                 | Mean                                     | Mean           | Mean    |             |
| <i>Pubertal variables (a)</i>                   |                                          |                |         |             |
| Age at thelarche, years                         | 12.9                                     | 12.0           | 11.4    | <0.001      |
| Age at menarche, years                          | 13.3                                     | 12.6           | 12.1    | <0.001      |
| Age at regular cycles, years                    | 14.3                                     | 13.7           | 13.4    | 0.004       |
| Age reached attained height, years              | 15.9                                     | 15.3           | 15.1    | 0.001       |
| Thelarche to menarche, years                    | 0.51                                     | 0.62           | 0.68    | 0.12        |
| Thelarche to regular cycles, years              | 1.22                                     | 1.28           | 1.58    | 0.15        |
| Thelarche to attained height, years             | 3.07                                     | 3.40           | 3.97    | 0.001       |
| Menarche to regular cycles, years               | 0.66                                     | 0.65           | 0.86    | 0.29        |
| Menarche to attained height, years              | 2.58                                     | 2.72           | 3.15    | 0.037       |
| <i>Adult anthropometrics (a)</i>                |                                          |                |         |             |
| Attained height, cms                            | 163.6                                    | 162.6          | 163.8   | 0.97        |
| Body mass index at mammogram, kg/m <sup>2</sup> | 24.4                                     | 25.8           | 27.9    | <0.001      |
| <i>Mammographic density, mean (b)</i>           |                                          |                |         |             |
| Percentage density, %                           | 23.8                                     | 21.3           | 17.3    | <0.001      |
| Absolute dense area, cm <sup>2</sup>            | 29.3                                     | 25.9           | 20.7    | <0.001      |
| Absolute nondense area, cm <sup>2</sup>         | 94.5                                     | 97.5           | 103.5   | 0.017       |
| Absolute total breast area, cm <sup>2</sup>     | 129.4                                    | 129.1          | 130.3   | 0.83        |

(a) Adjusted mean for age at mammogram of 58 years

(b) Adjusted mean (back-transformed to ordinary scale) for age at mammogram of 58 years and BMI at study entry of 25 kg/m<sup>2</sup>

(c) From linear regression model per category of weight compared with peers at age 11 years

Table S3: Adjusted means of pubertal variables, anthropometric and mammographic density characteristics by height compared with peers at age 11 years

|                                                 | Height at age 11 years relative to peers |                |        | P trend (c) |
|-------------------------------------------------|------------------------------------------|----------------|--------|-------------|
|                                                 | Shorter                                  | About the same | Taller |             |
|                                                 | Mean                                     | Mean           | Mean   |             |
| <i>Pubertal variables (a)</i>                   |                                          |                |        |             |
| Age at thelarche, years                         | 12.6                                     | 12.1           | 11.8   | <0.001      |
| Age at menarche, years                          | 13.1                                     | 12.7           | 12.5   | <0.001      |
| Age at regular cycles, years                    | 14.2                                     | 13.8           | 13.5   | 0.019       |
| Age reached attained height, years              | 15.7                                     | 15.6           | 15.1   | 0.003       |
| Thelarche to menarche, years                    | 0.59                                     | 0.59           | 0.62   | 0.79        |
| Thelarche to regular cycles, years              | 1.38                                     | 1.41           | 1.13   | 0.20        |
| Thelarche to attained height, years             | 3.18                                     | 3.63           | 3.39   | 0.49        |
| Menarche to regular cycles, years               | 0.72                                     | 0.75           | 0.60   | 0.37        |
| Menarche to attained height, years              | 2.56                                     | 3.01           | 2.69   | 0.73        |
| <i>Adult anthropometrics (a)</i>                |                                          |                |        |             |
| Attained height, cms                            | 157.7                                    | 162.7          | 168.1  | <0.001      |
| Body mass index at mammogram, kg/m <sup>2</sup> | 25.7                                     | 26.1           | 25.5   | 0.46        |
| <i>Mammographic density, mean (b)</i>           |                                          |                |        |             |
| Percentage density, %                           | 22.5                                     | 21.0           | 20.7   | 0.16        |
| Absolute dense area, cm <sup>2</sup>            | 27.0                                     | 25.1           | 26.4   | 0.72        |
| Absolute nondense area, cm <sup>2</sup>         | 93.2                                     | 96.7           | 102.6  | 0.003       |
| Absolute total breast area, cm <sup>2</sup>     | 125.8                                    | 127.6          | 135.2  | 0.002       |

(a) Adjusted mean for age at mammogram of 58 years

(b) Adjusted mean (back-transformed to ordinary scale) for age at mammogram of 58 years and BMI at study entry of 25 kg/m<sup>2</sup>

(c) From linear regression model per category of height compared with peers at age 11 years

Table S4: Correlations between pubertal factors and adult body mass index

|                             | Age at<br>thelarche | Age at<br>menarche | Age at<br>regular<br>cycles | Age reached<br>adult height | Attained<br>height | Adult<br>BMI |
|-----------------------------|---------------------|--------------------|-----------------------------|-----------------------------|--------------------|--------------|
| Age at thelarche            | 1.00                |                    |                             |                             |                    |              |
| Age at menarche             | 0.74                | 1.00               |                             |                             |                    |              |
| Age at regular periods      | 0.34                | 0.51               | 1.00                        |                             |                    |              |
| Age reached attained height | 0.27                | 0.30               | 0.17                        | 1.00                        |                    |              |
| Attained height             | 0.09                | 0.11               | 0.05                        | 0.22                        | 1.00               |              |
| Adult BMI                   | -0.16               | -0.15              | -0.08                       | 0.003                       | -0.18              | 1.00         |

Table S5: Difference in adult mammographic density parameters in relation to change in height compared with peers between age 7 and 11 years.

| Change in relative height age 7 to 11 years (c) |                | Mammographic density parameters                                    |                                                          |                                                              |
|-------------------------------------------------|----------------|--------------------------------------------------------------------|----------------------------------------------------------|--------------------------------------------------------------|
|                                                 |                | Percent density<br>Difference,<br>percentage points<br>(95% CI)(a) | Absolute area                                            |                                                              |
|                                                 |                |                                                                    | Dense area<br>Difference, cm <sup>2</sup><br>(95% CI)(a) | Non-dense area<br>Difference, cm <sup>2</sup><br>(95% CI)(a) |
| Category                                        |                |                                                                    |                                                          |                                                              |
| A:                                              | Decrease       | -4.8 (-8.9, -0.4)                                                  | -3.4 (-8.4, 2.1)                                         | 18.8 (3.7, 34.9)                                             |
|                                                 | About the same | 0.0 (baseline)                                                     | 0.0 (baseline)                                           | 0.0 (baseline)                                               |
|                                                 | Increase       | -1.3 (-5.0, 2.7)                                                   | -1.2 (-5.5, 3.6)                                         | 8.9 (-3.3, 21.7)                                             |
|                                                 | P trend (b)    | 0.36                                                               | 0.66                                                     | 0.59                                                         |
| B: +BMI adjusted                                | Decrease       | -3.6 (-7.4, 0.6)                                                   | -2.5 (-7.5, 3.0)                                         | 13.0 (1.3, 25.3)                                             |
|                                                 | About the same | 0.0 (baseline)                                                     | 0.0 (baseline)                                           | 0.0 (baseline)                                               |
|                                                 | Increase       | -0.7 (-4.1, 3.0)                                                   | -0.9 (-5.2, 3.8)                                         | 6.3 (-3.1, 16.2)                                             |
|                                                 | P trend (b)    | 0.41                                                               | 0.75                                                     | 0.65                                                         |
| C: +weight age 11 years                         | Decrease       | -3.6 (-7.4, 0.5)                                                   | -2.5 (-7.5, 2.9)                                         | 13.2 (1.6, 25.4)                                             |
|                                                 | About the same | 0.0 (baseline)                                                     | 0.0 (baseline)                                           | 0.0 (baseline)                                               |
|                                                 | Increase       | -0.3 (-3.7, 3.4)                                                   | -0.3 (-4.6, 4.3)                                         | 6.2 (-3.3, 16.0)                                             |
|                                                 | P trend (b)    | 0.30                                                               | 0.61                                                     | 0.62                                                         |

- (a) Differences derived with respect to reference levels: 25% for percentage density, 30 cm<sup>2</sup> for dense area and 110 cm<sup>2</sup> for nondense area. Models defined as follows: Model A: Analyses adjusted for age at mammogram (47-50, 50-54, 55-59 (baseline), 60-64, 65-69, 70-73 years), duration of oral contraception use (never (baseline), <5, 10-14, ≥15 years, not known), postmenopausal hormone treatment (never (baseline), former, current/<5, current/5-9, current/≥10 years duration), menopausal status and time since menopause (<5 (baseline), 10-14, 15-19, ≥20, unknown years postmenopausal, not postmenopausal), age at first birth and parity (nulliparous, 10-24y/1-2, 10-24y/≥3, 25-29y/1-2 (baseline), 25-29y/≥3, 30y/≥1), alcohol units (none (baseline), 1-4 to ≥25, in 5-unit increments), physical activity (<31 (baseline), 32-55, 56-88, ≥88 MET-hr/wk)
- Model B: adjusted for covariates in model A plus BMI (<20.0 (baseline) to >35.0, in 2.5 kg/m<sup>2</sup> increments)
- Model C: adjusted for covariates in model B plus weight compared with peers at age 11 years (thinner (baseline), about the same, heavier, not known)
- (b) P trend for linear regression fitted through categories of exposure
- (c) Increase or decrease in category of height compared with peers between ages 7 and 11 years

Table S6: Difference in adult mammographic density parameters across categories of age at reaching adult height

| Age at pubertal stage                  | Category    | Mammographic density parameters                                    |                                                          |                                                              |
|----------------------------------------|-------------|--------------------------------------------------------------------|----------------------------------------------------------|--------------------------------------------------------------|
|                                        |             | Percent density<br>Difference,<br>percentage points<br>(95% CI)(a) | Absolute area                                            |                                                              |
|                                        |             |                                                                    | Dense area<br>Difference, cm <sup>2</sup><br>(95% CI)(a) | Non-dense area<br>Difference, cm <sup>2</sup><br>(95% CI)(a) |
| <i>Age reached adult height, years</i> |             |                                                                    |                                                          |                                                              |
| A:                                     | ≤14         | 0.0 (baseline)                                                     | 0.0 (baseline)                                           | 0.0 (baseline)                                               |
|                                        | 15-16       | -0.5 (-3.9, 3.0)                                                   | -0.6 (-4.5, 3.5)                                         | 4.3 (-6.3, 15.4)                                             |
|                                        | ≥17         | 0.9 (-2.9, 5.0)                                                    | 1.3 (-3.2, 6.0)                                          | -0.4 (-11.9, 11.8)                                           |
|                                        | P trend (b) | 0.70                                                               | 0.62                                                     | 0.99                                                         |
| B: +BMI<br>adjusted                    | ≤14         | 0.0 (baseline)                                                     | 0.0 (baseline)                                           | 0.0 (baseline)                                               |
|                                        | 15-16       | -1.2 (-4.2, 1.9)                                                   | -1.1 (-4.8, 2.9)                                         | 7.4 (-1.0, 16.2)                                             |
|                                        | ≥17         | 0.6 (-2.9, 4.3)                                                    | 0.5 (-3.7, 5.2)                                          | 0.0 (-9.1, 9.5)                                              |
|                                        | P trend (b) | 0.80                                                               | 0.85                                                     | 0.89                                                         |
| C: +weight<br>age 11 years             | ≤14         | 0.0 (baseline)                                                     | 0.0 (baseline)                                           | 0.0 (baseline)                                               |
|                                        | 15-16       | -1.7 (-4.7, 1.5)                                                   | -1.5 (-5.2, 2.5)                                         | 8.6 (0.1, 17.5)                                              |
|                                        | ≥17         | 0.0 (-3.4, 3.7)                                                    | 0.0 (-4.2, 4.6)                                          | 1.3 (-7.9, 10.9)                                             |
|                                        | P trend (b) | 0.94                                                               | 0.97                                                     | 0.69                                                         |

- (a) Differences derived with respect to reference levels: 25% for percentage density, 30 cm<sup>2</sup> for dense area and 110 cm<sup>2</sup> for nondense area. Models defined as follows: Model A: Analyses adjusted for age at mammogram (47-50, 50-54, 55-59 (baseline), 60-64, 65-69, 70-73 years), duration of oral contraception use (never (baseline), <5, 10-14, ≥15 years, not known), postmenopausal hormone treatment (never (baseline), former, current/<5, current/5-9, current/≥10 years duration), menopausal status and time since menopause (<5 (baseline), 10-14, 15-19, ≥20, unknown years postmenopausal, not postmenopausal), age at first birth and parity (nulliparous, 10-24y/1-2, 10-24y/≥3, 25-29y/1-2 (baseline), 25-29y/≥3, 30y/≥1), alcohol units (none (baseline), 1-4 to ≥25, in 5-unit increments), physical activity (<31 (baseline), 32-55, 56-88, ≥88 MET-hr/wk)
- Model B: adjusted for covariates in model A plus BMI (<20.0 (baseline) to >35.0, in 2.5 kg/m<sup>2</sup> increments)
- Model C: adjusted for covariates in model B plus weight compared with peers at age 11 years (thinner (baseline), about the same, heavier, not known)
- (b) P trend for linear regression fitted through categories of exposure

Table S7: Difference in adult mammographic density parameters across categories of time interval between menarche and regular cycles

| Time interval                            | Category    | Mammographic density parameters                                    |                                                          |                                                              |
|------------------------------------------|-------------|--------------------------------------------------------------------|----------------------------------------------------------|--------------------------------------------------------------|
|                                          |             | Percent density<br>Difference,<br>percentage points<br>(95% CI)(a) | Absolute area                                            |                                                              |
|                                          |             |                                                                    | Dense area<br>Difference, cm <sup>2</sup><br>(95% CI)(a) | Non-dense area<br>Difference, cm <sup>2</sup><br>(95% CI)(a) |
| <i>Menarche to regular cycles, years</i> |             |                                                                    |                                                          |                                                              |
| A:                                       | 0           | 0.0 (baseline)                                                     | 0.0 (baseline)                                           | 0.0 (baseline)                                               |
|                                          | 1           | -1.1 (-4.0, 2.1)                                                   | -2.5 (-6.0, 1.4)                                         | 0.27 (-9.0, 9.9)                                             |
|                                          | ≥2          | -0.5 (-4.8, 4.1)                                                   | -0.1 (-5.3, 5.6)                                         | 6.5 (-6.9, 20.8)                                             |
|                                          | P trend (b) | 0.63                                                               | 0.55                                                     | 0.44                                                         |
| B: +BMI adjusted                         | 0           | 0.0 (baseline)                                                     | 0.0 (baseline)                                           | 0.0 (baseline)                                               |
|                                          | 1           | -2.0 (-4.7, 0.9)                                                   | -2.8 (-6.3, 0.9)                                         | 5.1 (-2.6, 13.0)                                             |
|                                          | ≥2          | -0.4 (-4.3, 3.9)                                                   | 0.2 (-5.0, 5.8)                                          | 5.9 (-5.1, 17.3)                                             |
|                                          | P trend (b) | 0.46                                                               | 0.55                                                     | 0.17                                                         |
| C: +weight age 11 years                  | 0           | 0.0 (baseline)                                                     | 0.0 (baseline)                                           | 0.0 (baseline)                                               |
|                                          | 1           | -1.9 (-4.7, 0.9)                                                   | -2.7 (-6.2, 1.0)                                         | 5.2 (-2.5, 13.1)                                             |
|                                          | ≥2          | -0.4 (-4.3, 3.8)                                                   | 0.0 (-5.1, 5.6)                                          | 5.8 (-5.1, 17.1)                                             |
|                                          | P trend (b) | 0.46                                                               | 0.54                                                     | 0.16                                                         |

- (a) Differences derived with respect to reference levels: 25% for percentage density, 30 cm<sup>2</sup> for dense area and 110 cm<sup>2</sup> for nondense area. Models defined as follows: Model A: Analyses adjusted for age at mammogram (47-50, 50-54, 55-59 (baseline), 60-64, 65-69, 70-73 years), duration of oral contraception use (never (baseline), <5, 10-14, ≥15 years, not known), postmenopausal hormone treatment (never (baseline), former, current/<5, current/5-9, current/≥10 years duration), menopausal status and time since menopause (<5 (baseline), 10-14, 15-19, ≥20, unknown years postmenopausal, not postmenopausal), age at first birth and parity (nulliparous, 10-24y/1-2, 10-24y/≥3, 25-29y/1-2 (baseline), 25-29y/≥3, 30y/≥1), alcohol units (none (baseline), 1-4 to ≥25, in 5-unit increments), physical activity (<31 (baseline), 32-55, 56-88, ≥88 MET-hr/wk)
- Model B: adjusted for covariates in model A plus BMI (<20.0 (baseline) to >35.0, in 2.5 kg/m<sup>2</sup> increments)
- Model C: adjusted for covariates in model B plus weight compared with peers at age 11 years (thinner (baseline), about the same, heavier, not known)
- (b) P trend for linear regression fitted through categories of exposure

Table S8: Difference in adult mammographic density parameters in relation to time interval between thelarche or menarche and age at reaching adult height

| Time interval                                    | Category    | Mammographic density parameters                                    |                                                          |                                                              |
|--------------------------------------------------|-------------|--------------------------------------------------------------------|----------------------------------------------------------|--------------------------------------------------------------|
|                                                  |             | Percent density<br>Difference,<br>percentage points<br>(95% CI)(a) | Absolute area                                            |                                                              |
|                                                  |             |                                                                    | Dense area<br>Difference, cm <sup>2</sup><br>(95% CI)(a) | Non-dense area<br>Difference, cm <sup>2</sup><br>(95% CI)(a) |
| <i>Thelarche to reaching adult height, years</i> |             |                                                                    |                                                          |                                                              |
| A:                                               | <2          | 0.0 (baseline)                                                     | 0.0 (baseline)                                           | 0.0 (baseline)                                               |
|                                                  | 2-3         | 2.0 (-2.5, 6.9)                                                    | -0.3 (-5.2, 5.2)                                         | -11.8 (-24.2, 1.4)                                           |
|                                                  | ≥4          | -0.4 (-4.6, 4.1)                                                   | 0.0 (-4.8, 5.4)                                          | 3.6 (-9.5, 17.3)                                             |
|                                                  | P trend (b) | 0.57                                                               | 0.95                                                     | 0.18                                                         |
| B: +BMI<br>adjusted                              | <2          | 0.0 (baseline)                                                     | 0.0 (baseline)                                           | 0.0 (baseline)                                               |
|                                                  | 2-3         | -0.1 (-4.1, 4.2)                                                   | -1.3 (-6.1, 3.9)                                         | -4.0 (-14.3, 6.9)                                            |
|                                                  | ≥4          | -0.1 (-4.0, 4.0)                                                   | 0.1 (-4.7, 5.2)                                          | 2.4 (-7.9, 13.2)                                             |
|                                                  | P trend (b) | 0.95                                                               | 0.81                                                     | 0.40                                                         |
| C: +weight<br>age 11                             | <2          | 0.0 (baseline)                                                     | 0.0 (baseline)                                           | 0.0 (baseline)                                               |
|                                                  | 2-3         | 0.2 (-3.8, 4.5)                                                    | -0.9 (-5.8, 4.3)                                         | -4.2 (-14.5, 6.7)                                            |
|                                                  | ≥4          | 0.5 (-3.4, 4.7)                                                    | 0.8 (-4.1, 6.1)                                          | 1.4 (-8.9, 12.2)                                             |
|                                                  | P trend (b) | 0.80                                                               | 0.60                                                     | 0.54                                                         |
| <i>Menarche to reaching adult height, years</i>  |             |                                                                    |                                                          |                                                              |
| A:                                               | <2          | 0.0 (baseline)                                                     | 0.0 (baseline)                                           | 0.0 (baseline)                                               |
|                                                  | 2-3         | -4.0 (-7.4, -0.4)                                                  | -5.1 (-9.1, -0.9)                                        | 5.6 (-6.4, 18.2)                                             |
|                                                  | ≥4          | -4.4 (-7.7, -0.8)                                                  | -3.8 (-7.8, 0.5)                                         | 13.9 (1.7, 26.7)                                             |
|                                                  | P trend (b) | 0.020                                                              | 0.10                                                     | 0.025                                                        |
| B: +BMI<br>adjusted                              | <2          | 0.0 (baseline)                                                     | 0.0 (baseline)                                           | 0.0 (baseline)                                               |
|                                                  | 2-3         | -4.5 (-7.6, -1.2)                                                  | -5.6 (-9.4, -1.4)                                        | 7.0 (-2.6, 16.9)                                             |
|                                                  | ≥4          | -3.3 (-6.5, 0.0)                                                   | -3.4 (-7.3, 0.9)                                         | 8.0 (-1.4, 17.7)                                             |
|                                                  | P trend (b) | 0.061                                                              | 0.14                                                     | 0.10                                                         |
| C: +weight<br>age 11                             | <2          | 0.0 (baseline)                                                     | 0.0 (baseline)                                           | 0.0 (baseline)                                               |
|                                                  | 2-3         | -4.5 (-7.6, -1.2)                                                  | -5.5 (-9.3, -1.3)                                        | 7.3 (-2.3, 17.3)                                             |
|                                                  | ≥4          | -3.1 (-6.3, 0.3)                                                   | -3.0 (-7.0, 1.3)                                         | 7.8 (-1.6, 17.6)                                             |
|                                                  | P trend (b) | 0.082                                                              | 0.19                                                     | 0.11                                                         |

- (a) Differences derived with respect to reference levels: 25% for percentage density, 30 cm<sup>2</sup> for dense area and 110 cm<sup>2</sup> for nondense area. Models defined as follows: Model A: Analyses adjusted for age at mammogram (47-50, 50-54, 55-59 (baseline), 60-64, 65-69, 70-73 years), duration of oral contraception use (never (baseline), <5, 10-14, ≥15 years, not known), postmenopausal hormone treatment (never (baseline), former, current/<5, current/5-9, current/≥10 years duration), menopausal status and time since menopause (<5 (baseline), 10-14, 15-19, ≥20, unknown years postmenopausal, not postmenopausal), age at first birth and parity (nulliparous, 10-24y/1-2, 10-24y/≥3, 25-29y/1-2 (baseline), 25-29y/≥3, 30y/≥1), alcohol units (none (baseline), 1-4 to ≥25, in 5-unit increments), physical activity (<31 (baseline), 32-55, 56-88, ≥88 MET-hr/wk)
- Model B: adjusted for covariates in model A plus BMI (<20.0 (baseline) to >35.0, in 2.5 kg/m<sup>2</sup> increments)
- Model C: adjusted for covariates in model B plus weight compared with peers at age 11 years (thinner (baseline), about the same, heavier, not known)
- (b) P trend for linear regression fitted through categories of exposure
